# Supplementary material for: Sample size calculations for model validation in linear regression analysis
Source: PubMed Central journal article supplement (PMC6416874; doi:10.1186/s12874-019-0697-9), 2019-03-12
Supplement: 12874_2019_697_MOESM3_ESM.pdf [file 12874_2019_697_MOESM3_ESM.pdf]

Table S1 Computed sample size, estimated power, and simulated power for Normal predictors with  $\{\beta_L, \beta_S\} = \{0.4, 1.4\}$ ,  $\{\beta_{I0}, \beta_{S0}\} = \{0, 1\}$ ,  $\sigma^2 = 1$ , Type I error  $\alpha = 0.05$ , and nominal power  $1 - \beta = 0.90$

| $\mu_X$ | $\sigma_X^2$ | $N$ | Simulated power | Exact approach  |         | Approximate method |         |
|---------|--------------|-----|-----------------|-----------------|---------|--------------------|---------|
|         |              |     |                 | Estimated power | Error   | Estimated power    | Error   |
| 0       | 0.5          | 58  | 0.9012          | 0.9044          | 0.0032  | 0.7604             | -0.1408 |
|         | 1            | 45  | 0.9057          | 0.9037          | -0.0020 | 0.6358             | -0.2699 |
|         | 2            | 32  | 0.9014          | 0.9043          | 0.0029  | 0.4719             | -0.4295 |
| 0.5     | 0.5          | 33  | 0.9031          | 0.9033          | 0.0002  | 0.8445             | -0.0586 |
|         | 1            | 29  | 0.9033          | 0.9035          | 0.0002  | 0.7861             | -0.1172 |
|         | 2            | 24  | 0.9171          | 0.9084          | -0.0087 | 0.6890             | -0.2281 |
| 1       | 0.5          | 22  | 0.9125          | 0.9122          | -0.0003 | 0.8848             | -0.0277 |
|         | 1            | 20  | 0.9034          | 0.9035          | 0.0001  | 0.8449             | -0.0585 |
|         | 2            | 18  | 0.9048          | 0.9082          | 0.0034  | 0.7938             | -0.1110 |
