# Supplementary material for: Sample size calculations for model validation in linear regression analysis
Source: PubMed Central journal article supplement (PMC6416874; doi:10.1186/s12874-019-0697-9), 2019-03-12
Supplement: 12874_2019_697_MOESM4_ESM.pdf [file 12874_2019_697_MOESM4_ESM.pdf]

Table S2 Computed sample size, estimated power, and simulated power for Normal predictors with  $\{\beta_L, \beta_S\} = \{0.5, 1.5\}$ ,  $\{\beta_{l0}, \beta_{s0}\} = \{0, 1\}$ ,  $\sigma^2 = 1$ , Type I error  $\alpha = 0.05$ , and nominal power  $1 - \beta = 0.90$

| $\mu_X$ | $\sigma_X^2$ | $N$ | Simulated power | Exact approach  |         | Approximate method |         |
|---------|--------------|-----|-----------------|-----------------|---------|--------------------|---------|
|         |              |     |                 | Estimated power | Error   | Estimated power    | Error   |
| 0       | 0.5          | 39  | 0.9064          | 0.9066          | 0.0002  | 0.7698             | -0.1366 |
|         | 1            | 31  | 0.9048          | 0.9083          | 0.0035  | 0.6542             | -0.2506 |
|         | 2            | 22  | 0.8988          | 0.9001          | 0.0013  | 0.4805             | -0.4183 |
| 0.5     | 0.5          | 23  | 0.9049          | 0.9100          | 0.0051  | 0.8583             | -0.0466 |
|         | 1            | 20  | 0.9026          | 0.9016          | -0.0010 | 0.7931             | -0.1095 |
|         | 2            | 17  | 0.9101          | 0.9076          | -0.0025 | 0.7053             | -0.2048 |
| 1       | 0.5          | 15  | 0.8964          | 0.9020          | 0.0056  | 0.8768             | -0.0196 |
|         | 1            | 15  | 0.9210          | 0.9215          | 0.0005  | 0.8768             | -0.0442 |
|         | 2            | 13  | 0.9066          | 0.9062          | -0.0004 | 0.8059             | -0.1007 |
