# Supplementary material for: Sample size calculations for model validation in linear regression analysis
Source: PubMed Central journal article supplement (PMC6416874; doi:10.1186/s12874-019-0697-9), 2019-03-12
Supplement: 12874_2019_697_MOESM5_ESM.pdf [file 12874_2019_697_MOESM5_ESM.pdf]

Table S3 Computed sample size, estimated power, and simulated power for transformed Exponential predictors with  $\{\beta_L, \beta_S\} = \{0.3, 1.3\}$ ,  $\{\beta_{L0}, \beta_{S0}\} = \{0, 1\}$ ,  $\sigma^2 = 1$ , Type I error  $\alpha = 0.05$ , and nominal power  $1 - \beta = 0.90$

| $\mu_X$ | $\sigma_X^2$ | $N$ | Simulated power | Exact approach  |        | Approximate method |         |
|---------|--------------|-----|-----------------|-----------------|--------|--------------------|---------|
|         |              |     |                 | Estimated power | Error  | Estimated power    | Error   |
| 0       | 0.5          | 99  | 0.8941          | 0.9025          | 0.0084 | 0.7524             | -0.1417 |
|         | 1            | 76  | 0.8831          | 0.9030          | 0.0199 | 0.6257             | -0.2574 |
|         | 2            | 53  | 0.8727          | 0.9050          | 0.0323 | 0.4602             | -0.4125 |
| 0.5     | 0.5          | 56  | 0.9020          | 0.9055          | 0.0035 | 0.8430             | -0.0590 |
|         | 1            | 48  | 0.8874          | 0.9024          | 0.0150 | 0.7756             | -0.1118 |
|         | 2            | 38  | 0.8693          | 0.9006          | 0.0313 | 0.6604             | -0.2089 |
| 1       | 0.5          | 35  | 0.9000          | 0.9013          | 0.0013 | 0.8682             | -0.0318 |
|         | 1            | 33  | 0.9061          | 0.9089          | 0.0028 | 0.8445             | -0.0616 |
|         | 2            | 28  | 0.8832          | 0.9016          | 0.0184 | 0.7689             | -0.1143 |
