# Supplementary material for: Sample size calculations for model validation in linear regression analysis
Source: PubMed Central journal article supplement (PMC6416874; doi:10.1186/s12874-019-0697-9), 2019-03-12
Supplement: 12874_2019_697_MOESM7_ESM.pdf [file 12874_2019_697_MOESM7_ESM.pdf]

Table S5 Computed sample size, estimated power, and simulated power for transformed Laplace predictors with  $\{\beta_L, \beta_S\} = \{0.3, 1.3\}$ ,  $\{\beta_{I0}, \beta_{S0}\} = \{0, 1\}$ ,  $\sigma^2 = 1$ , Type I error  $\alpha = 0.05$ , and nominal power  $1 - \beta = 0.90$

| $\mu_X$ | $\sigma_X^2$ | $N$ | Simulated power | Exact approach  |         | Approximate method |         |
|---------|--------------|-----|-----------------|-----------------|---------|--------------------|---------|
|         |              |     |                 | Estimated power | Error   | Estimated power    | Error   |
| 0       | 0.5          | 99  | 0.8994          | 0.9025          | 0.0031  | 0.7524             | -0.1470 |
|         | 1            | 76  | 0.8948          | 0.9030          | 0.0082  | 0.6257             | -0.2691 |
|         | 2            | 53  | 0.8897          | 0.9050          | 0.0153  | 0.4602             | -0.4295 |
| 0.5     | 0.5          | 56  | 0.9060          | 0.9055          | -0.0005 | 0.8430             | -0.0630 |
|         | 1            | 48  | 0.8975          | 0.9024          | 0.0049  | 0.7756             | -0.1219 |
|         | 2            | 38  | 0.8903          | 0.9006          | 0.0103  | 0.6604             | -0.2299 |
| 1       | 0.5          | 35  | 0.8965          | 0.9013          | 0.0048  | 0.8682             | -0.0283 |
|         | 1            | 33  | 0.9058          | 0.9089          | 0.0031  | 0.8445             | -0.0613 |
|         | 2            | 28  | 0.9011          | 0.9016          | 0.0005  | 0.7689             | -0.1322 |
