# Supplementary material for: Sample size calculations for model validation in linear regression analysis
Source: PubMed Central journal article supplement (PMC6416874; doi:10.1186/s12874-019-0697-9), 2019-03-12
Supplement: 12874_2019_697_MOESM8_ESM.pdf [file 12874_2019_697_MOESM8_ESM.pdf]

Table S6 Computed sample size, estimated power, and simulated power for transformed Uniform predictors with  $\{\beta_L, \beta_S\} = \{0.3, 1.3\}$ ,  $\{\beta_{I0}, \beta_{S0}\} = \{0, 1\}$ ,  $\sigma^2 = 1$ , Type I error  $\alpha = 0.05$ , and nominal power  $1 - \beta = 0.90$

| $\mu_X$ | $\sigma_X^2$ | $N$ | Simulated power | Exact approach  |         | Approximate method |         |
|---------|--------------|-----|-----------------|-----------------|---------|--------------------|---------|
|         |              |     |                 | Estimated power | Error   | Estimated power    | Error   |
| 0       | 0.5          | 99  | 0.8971          | 0.9025          | 0.0054  | 0.7524             | -0.1447 |
|         | 1            | 76  | 0.9101          | 0.9030          | -0.0071 | 0.6257             | -0.2844 |
|         | 2            | 53  | 0.9076          | 0.9050          | -0.0026 | 0.4602             | -0.4474 |
| 0.5     | 0.5          | 56  | 0.9078          | 0.9055          | -0.0023 | 0.8430             | -0.0648 |
|         | 1            | 48  | 0.9000          | 0.9024          | 0.0024  | 0.7756             | -0.1244 |
|         | 2            | 38  | 0.9036          | 0.9006          | -0.0030 | 0.6604             | -0.2432 |
| 1       | 0.5          | 35  | 0.8990          | 0.9013          | 0.0023  | 0.8682             | -0.0308 |
|         | 1            | 33  | 0.9124          | 0.9089          | -0.0035 | 0.8445             | -0.0679 |
|         | 2            | 28  | 0.8994          | 0.9016          | 0.0022  | 0.7689             | -0.1305 |
